# 5 **VAPPER: High-throughput Variant Antigen Profiling in** 6 **African trypanosomes**

7 Sara Silva Pereira<sup>1¶\*</sup>, John Heap<sup>2</sup>, Andrew R. Jones<sup>3</sup>, Andrew P. Jackson<sup>1\*</sup>

8

9 1.

10 Department of Infection Biology

11 Institute of Infection and Global Health

12 University of Liverpool

13 Liverpool Science Park Ic2

14 146 Brownlow Hill

15 Liverpool L3 5RF

16 United Kingdom

17 2.

18 Computational Biology Facility

19 University of Liverpool

20 Liverpool L69 7ZB

21 United Kingdom

22 3.

23 Institute of Integrative Biology

24 University of Liverpool

25 Liverpool L69 7ZB

26 United Kingdom

27

28 <sup>¶</sup>Current Address:

29 Instituto de Medicina Molecular, Faculdade de Medicina, Universidade de Lisboa,

30 Lisbon, Portugal

31

32 \*Corresponding authors

33 Email: [ssilvapereira@medicina.ulisboa.pt](mailto:ssilvapereira@medicina.ulisboa.pt)

34 Email: [a.p.jackson@liverpool.ac.uk](mailto:a.p.jackson@liverpool.ac.uk)

35

## 36 **Abstract**

37

38 **Background:** Analysing variant antigen gene families on a population scale is a  
 39 difficult challenge for conventional methods of read mapping and variant calling due  
 40 to the great variability in sequence, copy number and genomic loci. In African  
 41 trypanosomes, hemoparasites of humans and animals, this is complicated by variant  
 42 antigen repertoires containing hundreds of genes subject to various degrees of  
 43 sequence recombination. **Findings:** We introduce Variant Antigen Profiler  
 44 (VAPPER), a tool that allows automated analysis of variant antigen repertoires of  
 45 African trypanosomes. VAPPER produces variant antigen profiles for any isolate of  
 46 the veterinary pathogens *Trypanosoma congolense* and *Trypanosoma vivax* from  
 47 genomic and transcriptomic sequencing data and delivers publication-ready figures  
 48 that show how the queried isolate compares with a database of existing strains.  
 49 VAPPER is implemented in Python. It can be installed to a local Galaxy instance  
 50 from the ToolShed (<https://toolshed.g2.bx.psu.edu/>) or locally on a Linux platform via  
 51 the command line (<https://github.com/PGB-LIV/VAPPER>). The documentation,  
 52 requirements, examples, and test data are provided in the Github repository.  
 53 **Conclusion:** Our approach is the first to allow large-scale analysis of trypanosome  
 54 variant antigens and establishes two different methodologies that may be applicable  
 55 to other multi-copy gene families that are otherwise refractory to high-throughput  
 56 analysis.

57

**Keywords:** VAPPER; variant antigen profiling; African trypanosomes; variant surface glycoproteins

## Background

Advances in next-generation sequencing have enabled researchers to produce high-throughput genomic data for diverse pathogens. However, analysing multi-copy, contingency gene families remains challenging due to their abundance, high mutation and recombination rates, and unstable gene loci [1]. Yet, these gene families are often involved in many processes of pathogenesis, including antigenic variation, virulence, host use, and immune modulation in a multitude of pathogens [2–4]. A prime example of a crucial gene family lacking the necessary analytic tools for high-throughput analysis is the Variant Surface Glycoprotein (VSG) superfamily in African trypanosomes [5].

African trypanosomes are extracellular hemoparasites that cause human sleeping sickness and animal African trypanosomiasis (AAT). Their genomes contain up to 2500 VSG genes [6] dispersed through specialized, hemizygous chromosomal regions called subtelomeres, smaller chromosomes, and less frequently in the core of megabase-sized diploid chromosomes. The VSG genes encode variant surface glycoproteins, GPI-anchored proteins that coat the entire surface of the parasite in the bloodstream of the mammal host, which function mostly in antigenic variation and immune-modulation [7]. Sporadically, specific VSG genes have been shown to evolve other functions, not related to antigenic variation, such as conferring human infectivity to *T. brucei gambiense* (*TgsGP* gene) [8,9] and *T. brucei rhodesiense* (*SRA* gene) [10,11], resistance to the drug suramin (*VSG<sup>sur</sup>* gene) [12], and mediating the transport of transferrin (*TfR* genes) [13,14].

85 As they are key players in host-trypanosome interaction, understanding VSG  
86 diversity and its impact in pathology, disease phenotype and virulence is of foremost  
87 importance in trypanosome research [4]. However, the VSG repertoire cannot be  
88 accurately analysed using conventional approaches of read mapping and variant  
89 calling. Attempts to bypass this challenge have resulted in alternative approaches  
90 using manually-curated VSG gene databases for specific *T. brucei* strains [6,15–17],  
91 but to the best of our knowledge there is no automated tool for the systematic  
92 analysis of VSG from any trypanosome genome. Thus, we have developed Variant  
93 Antigen Profiler (VAPPER), a tool that examines VSG repertoires in DNA/RNA  
94 sequence data of the main livestock trypanosomes, *Trypanosoma congolense* and *T.*  
95 *vivax*, and quantifies antigenic diversity. This results in a variant antigen profile (VAP)  
96 that can be compared between isolates, locations, and experimental conditions [18].  
97 In this paper we briefly present how VAPPER can be used to further our knowledge  
98 of antigenic diversity and variation.

99

## 100 Findings

### 101 The service

102 VAPPER is primarily intended for producing and comparing VAPs of livestock  
103 trypanosomes, without the need for complex bioinformatic processes. It is available  
104 online through the Galaxy ToolShed [19] for a local Galaxy server [20], and as a  
105 Linux package for local installation. The program has three pipelines, specific for  
106 each organism (*T. congolense* or *T. vivax*) and input data type (genome or  
107 transcriptome). VAPPER requires quality-filtered, trimmed, paired sequencing reads  
108 in FASTQ format [21] or assembled contigs in FASTA format [22]. Results are  
109 presented in tables of frequencies, heatmaps, and Principal Component Analysis  
110 (PCA) plots, visualized as HTML files or exported to PDF or PNG format. A typical  
111 workflow is shown in Fig. 1.

112

113 For *T. congolense* genomic VAPs (gVAP), VAPPER starts with genome assembly of  
114 raw, short reads using Velvet 1.2.10 [23]. Assembled contigs are screened for pre-  
115 defined protein motifs described by a hidden Markov model using HMMER 3.1b2 [24]  
116 after 6-frame translation. A detailed description of the universal protein motifs and  
117 their biological significance in a recent manuscript [18], but, in summary, each protein  
118 motif or motif combination is diagnostic of a specific phylotype [18]; therefore,  
119 phylotype frequency can be calculated from the HMMER output. The proportions of  
120 each phylotype represent the gVAP and are recorded in a table of frequencies. The  
121 gVAP produced is also placed in the context of a *T. congolense* genome database  
122 supplied with VAPPER (N=97, [18,25]), which is regularly updated. This is achieved  
123 through a Euclidean distance-based clustering analysis. Results are presented as  
124 two heatmaps with corresponding dendrograms, one showing phylotype frequency,  
125 and the other showing frequency deviation from the population mean. They are also  
126 shown as a PCA plot and a table of frequencies.

127

128 For *T. congolense* transcriptomic analyses (tVAP), VAPPER performs read mapping  
129 using Bowtie 2 2.2.6 [26], reference-based transcript assembly and abundance  
130 calculation using Cufflinks 2.2.1 [27], and VSG transcript screening and phylotype  
131 assigning as described for gVAP. The proportions of each phylotype are then  
132 adjusted for transcript abundance based on the Cufflinks output (Fig. 1). The tVAP is  
133 presented as a weighted bar chart and compared to the gVAP of the reference (Fig.  
134 2c). Ideally, the user would provide their own reference genome for the mapping  
135 step. As that is not always possible, especially for field isolate analysis, we provide  
136 two reference genomes, the IL3000 Kenyan isolate [14,28], and the Tc1/148 Nigerian  
137 isolate [29,30]. Choosing the most adequate reference for the sample being analysed  
138 may potentially improve the VAPPER results by increasing mapping sensitivity.  
139 However, we have previously shown that closely related *T. congolense* strains (i.e.

140 with short genetic distances) do not always have equally related VSG repertoires  
141 [18].

142

143 For *T. vivax*, the gVAP is based on presence or absence of pre-defined VSG genes,  
144 rather than phylotype frequencies as described for *T. congolense*. The *T. vivax* VSG  
145 repertoire is composed of distantly related lineages with no evidence for  
146 recombination [14]. Therefore, unlike *T. congolense* and *T. brucei*, VSG genes are  
147 often conserved across multiple strains, allowing us to build a VSG database for the  
148 entire species. No *T. vivax* tVAP is currently offered due to the lack of enough  
149 transcriptomic data available for benchmarking, but work is on-going to add this  
150 function. VSG-containing contigs are identified using BLAST 2.7.1 to detect  
151 sequence homology with a *T. vivax* VSG database. This information is added to a  
152 regularly updated presence/absence binary matrix of *T. vivax* genomes (N=29) and  
153 applied to a Euclidean distance-based clustering analysis. The results are presented  
154 as a heatmap and dendrogram, putting the sample in the context of the remaining *T.*  
155 *vivax* genomes and their known countries of origin (Fig. 3).

156

157 In its Linux version, VAPPER can process multiple samples concurrently, providing  
158 that the input files are compiled in a single directory. Results are shown for all  
159 samples simultaneously, allowing direct comparison of variant antigen profiles across  
160 multiple isolates, conditions, or replicates. The tabular output can be incorporated in  
161 downstream statistical analysis, whilst the graphical outputs provide figures for the  
162 visualization of antigen repertoire variability.

163

## 164 Linux Package Installation

165 To facilitate usage, the installation of VAPPER and its dependencies is automated.  
166 Upon first download of the software, a single script will ensure the system has all the

required dependencies and install them in a local directory if necessary. In naïve environments and for users without administrator rights to install the necessary libraries, a Python virtual environment can be set upon each new session.

170

## 171 The Galaxy Tool

VAPPER is available for installation in local Galaxy servers from the Galaxy ToolShed

174 ([https://toolshed.g2.bx.psu.edu/repository?repository\\_id=08b5616f1d3df20c](https://toolshed.g2.bx.psu.edu/repository?repository_id=08b5616f1d3df20c)). The

purpose of the incorporation of VAPPER in Galaxy is to provide a simple front-end component for non-experienced users (Fig. 2). Results can be visualised directly in Galaxy, or can be downloaded as a compressed folder containing an HTML file with combined results, individual PNG and PDF files of the heatmaps, PCA plots, and bar charts produced, and the CSV files containing the raw values of phylotype proportions and deviation from the mean.

181

## 182 Benchmarking

The performance of the *T. congolense* gVAP pipeline was compared to the manually annotated VAP of the IL3000 reference genome (Fig. 3A) and to the BLAST-based VAPs of 41 isolates (Fig. 3B) [18]. There is a very good correlation between profiles produced by VAPPER and the known IL3000 VAP ( $R^2 = 0.88$ ,  $t(13) = 9.7321$ ,  $P < 0.001$ ) and a good correlation with the BLAST-based method ( $R^2=0.67$ , Pearson's product moment correlation,  $t_{(566)}=34.4$ ,  $p < 0.001$ ). Minor differences were further investigated and found to be due to BLAST's difficulty in either analysing small contigs or quantifying multiple VSGs in the same contig sequence. Therefore, in general, more VSGs were recovered with VAPPER than with BLAST (Mean  $\pm \sigma=721\pm277$  vs.  $669 \pm 292$ , paired  $t$ -test,  $p$ -value = 0.005). A further strength of VAPPER is the ability to deal with poor, fragmented, genome assemblies. As

described in our previous paper [18], when a single VSG gene is located in two distinct contig fragments, BLAST counts them incorrectly as separate genes, whereas VAPPER will not because the diagnostic motif is only present once. Therefore, we can now accurately calculate antigen profiles from incomplete genome assemblies (up to 30%), and with a VSG fragmentation level up to 40% of the original gene length (223 nucleotides) (Fig. 3C).

## Validation by example

### *T. congolense* gVAP

We have used the VAPPER to analyse the genomic repertoire of 98 *T. congolense* samples of savannah and forest-subtypes, collected from 12 countries across Africa, and previously described by us [18] and others [25]. In Fig. 4, two heatmaps and corresponding dendrograms show how the VSG repertoires of each strain relate to each other. On the left, the heatmap represents phylotype proportion, i.e. how many genes a specific phylotype contains in the context of the complete VSG repertoire for a given strain (Fig. 4A). This heatmap shows that P4, 8, 9, 10, and 14 have few genes in all strains, whereas other phylotypes (e.g. P1, 2, 15) are more variable, being quite abundant in some strains and rare in others. The heatmap on the right shows phylotype deviation from the mean (Fig. 4B), which is calculated as the difference between the phylotype proportion shown in panel A and the arithmetic mean of phylotype proportions. The latter is calculated from the current database, thus it will change as new samples are added.

The phylotype proportion variation patterns are perhaps better detected in the normalised heatmap (Fig. 4B). For example, it is possible to detect a signature of underrepresented P15 characteristic of all forest-subtype samples (denoted by “a”), abundant P15 in all Kenyan isolates (in purple), as well as a distinct pattern



characteristic of strains IL3578 to IL2326, characterised by the combination of low P1 to 3 and high P7 (denoted by “b”). The latter does not seem to be related to geography, as it encompasses isolates from Kenya, Uganda, and Burkina Faso. The PCA plot further indicates that VSG repertoires and geography are only weakly correlated (Fig. 4C), which agrees with our previous observation that *T. congolense* VSG repertoires do not mimic either population structure or geography [18].

## *T. congolense* tVAPs

We have used VAPPER to analyse the expressed VSG repertoire of the metacyclic (infective) life stage of *T. congolense*. For that, we have produced a tVAP for the strain TC13, whose transcriptome was published by Awuoché *et al.* (2018) [31]. We have compared its metacyclic tVAP to the metacyclic tVAP of the 1/148 strain (MBOI/NG/60/1-148) that we have previously described [29]. Furthermore, we have compared them to the genomic VSG repertoires of the same strain, or a related one (Fig. 5). As we do not have a genome sequence for the TC13 isolate, we compared it to IL3000, which was isolated in the same region (Transmara, Kenya) [32].

When we compare the gVAPs of 1/148 and IL3000, we see that they are distinct, and so are the tVAPs (e.g. P4 is more represented in TC13, whereas P10 is more represented in 1/148 than in TC13). However, P8 is overrepresented in both isolates compared to the genomic repertoires (Fig. 5). This agrees with our previous observation that the pattern of metacyclic VSG expression is significantly different from the genome repertoires, and that the metacyclic VSG repertoire is particularly enriched for P8 genes [18]. With the analysis of the TC13 transcriptome, we can now add that this enrichment does not seem to be strain-specific, but rather equally applicable to *T. congolense* strains of distinct backgrounds.

248 *T. vivax* gVAP

249 The *T. vivax* gVAP shows the VAPs in the context of the sample cohort (N=29),

250 which currently includes samples from Nigeria, Uganda, Gambia, Ivory Coast, Brazil,

251 Burkina Faso, and Togo. The dendrogram represents the relationships between the

252 multiple strains, whereas the heatmap shows whether VSG genes are present or

253 absent in each strain (Fig. 6A). The VAP relationship shows a separation between

254 Nigerian (in dark blue) and the remaining samples, as well as a clear difference

255 between Brazilian and Ugandan isolates. The geographical signature is diminished

256 slightly in the non-Nigerian West African strains, although this is may reflect the

257 smaller number of samples per country and perhaps the geographical closeness

258 between Togo, Burkina Faso, and Ivory Coast. Despite the lack of a transcriptomic

259 pipeline for *T. vivax*, we can use the gVAP to understand the geographical

260 distribution of expressed VSGs. As an example, we took the two most abundant

261 VSGs in the transcriptomes of three strains (i.e. LIEM-176 from Venezuela [33],

262 IL1392 from Nigeria [34], and Lins from Brazil [35]) and compared them to the VAP

263 database (Fig. 6B). We observe that there are five different VSGs, which represent

264 three different geographical patterns (Fig. 6C). Specifically, the first LIEM-176 VSG

265 transcript has been found in strains from Venezuela, Nigeria and Gambia, but not in

266 Brazil, Uganda, or Ivory Coast (map 1 in Fig. 6C). The second LIEM-176 VSG is

267 present in Brazil, Venezuela, Nigeria, and Uganda, yet not in Ivory Coast, a pattern

268 that is shared with the top two most abundant VSGs in Lins (map 2 in Fig. 6C).

269 Finally, the top two most abundant VSGs in IL1392 have been found in strains from

270 Brazil, Venezuela, Gambia, Nigeria, but not in Uganda nor Ivory Coast (map 3 in Fig.

271 6C). It is possible that strain or location-specific VSGs might be epidemiologically

272 relevant, perhaps contributing to the considerable phenotypic variation observed in *T.*

273 *vivax* AAT.

274

## Conclusion

VAPPER is the first tool for the systematic analysis of VSG gene and expression diversity across strains and during infections. It establishes a practical approach for measuring antigenic diversity in these important pathogens based on universal protein motifs and/or gene mapping. Despite being often seen as a veterinary extension of HAT, AAT is a spectrum of diseases, dependent on the multiple species and strains of African trypanosomes and their multiple mammal hosts [36]. This predicament results in large variability in pathogenesis, epidemiology, and clinical outcome that remains poorly understood. For example, in East Africa, *T. vivax*, usually causes mild, chronic disease, but has occasionally resulted in acute haemorrhagic syndromes [37] without apparent reason. Likewise, in Brazil, related strains of *T. vivax* can cause both chronic disease of low parasitaemia and localized epidemics of up to 70% mortality rates, even in the same host species (although perhaps not the same genetic background) [38–40]. VAPPER allows us to identify and characterise differences in antigenic repertoires between strains, hosts, and conditions, which may be the starting point to build a real understanding of the association between disease genotypes and phenotypes. Importantly, with time this approach may be extended to the analysis of similar multi-copy, contingency gene families, particularly those involved in antigenic variation, in diverse pathogens.

## Availability and requirements

Project name: VAPPER – High-throughput Variant Antigen Profiling in African trypanosomes

Project home page: <https://github.com/PGB-LIV/VAPPER>

Operating System: Platform independent

Programming language: Python

301 Installation Requirements: Velvet 1.2.10; HMMER 3.1b2; Bowtie 2 2.2.6; SAMtools  
302 1.6; Cufflinks 2.2.1; BLAST 2.7.1; EMBOSS  
303 License: Apache v.2.0  
304

## 305 **Figure Legends**

306 **Figure 1** Methodological workflow according to species (*T. congolense* or *T. vivax*)  
307 and input data [genomic (gVAP) or transcriptomic (tVAP)].  
308

309 **Figure 2 Screenshot of VAPPER on the Galaxy interface.** This interface is  
310 available after installation of VAPPER from the Galaxy ToolShed [19] into a local  
311 Galaxy server. In this case, VAPPER was installed on the University of Liverpool  
312 Galaxy server. The blue panel on the right shows how to search and select VAPPER  
313 after installation. The white panel at the centre shows the options available for the  
314 user, including the prefix name of the sample to appear on the output figures, the  
315 species, and the type of input data. If any genomic pipeline is selected, further  
316 options for genome assembly parameters are available. Finally, the user can choose  
317 whether to get the graphs in PDF format (default is PNG only).  
318

319 **Figure 3 VAPPER performance (*T. congolense* genomic pipeline).** (A)  
320 Correlation of phylotype frequencies produced by VAPPER and those manually  
321 curated in the *T. congolense* IL3000 reference genome sequence [14]. Pearson's  
322 product moment correlation statistics:  $R^2 = 0.88$ ,  $t(13) = 9.7321$ ,  $P < 0.001$ . (B)  
323 Correlation of phylotype frequencies produced by VAPPER and BLAST-based [41]  
324 phylotype frequencies in a panel of 41 *T. congolense* strains. Pearson's product  
325 moment correlation:  $R^2 = 0.64$ ,  $t(566) = 34.39$ ,  $P < 0.001$ . Phylotypes are color-coded  
326 according to the key. (C) VAPPER accuracy in fragmented (red) or incomplete (blue)  
327 genomes. Line graphs show correlations of the expected antigen profiles of a known

set of VSGs sequences from the IL3000 genome sequence with antigen profiles produced from fragmented VSGs or incomplete VSG repertoires. Fragmentation and genome incompleteness were simulated from random sampling. Gene fragmentation was calculated as a proportion of the mean length of the original VSG sequences (Mean $\pm\sigma$ =1163 $\pm$ 129 nucleotides). Figure adapted from [18].

**Figure 4 VAPPER output for *T. congolense* genomic pipeline.** (A) Heatmap and corresponding dendrogram showing the variant antigen profiles (VAP) of the current genomic database expressed as phylotype frequencies [18,25]. (B) Heatmap and corresponding dendrogram showing the variant antigen profiles (VAP) of the current genomic database expressed as deviation from the mean phylotype frequency [18,25]. Labels “a” and “b” are referred to in the text. (C) PCA plot representing variation in VSG repertoire across the *T. congolense* genomic database [18,25] (N=97).

**Figure 5 VAPPER output for *T. congolense* transcriptomic pipeline.** Stacked bar charts showing expressed variant antigen profiles (VAPs) of metacyclic-stage *T. congolense* from strain 1/148 [18] and TC13 [31] compared to the genomic repertoires of the same strain (1/148) or a closely related one (IL3000) [28]. Phylotypes are colour-coded according to key. Size of each stack represents proportion of the phylotype relative to the total repertoire of expressed VSGs.

**Figure 6 VAPPER output for *T. vivax* and its uses.** (A) Heatmap and corresponding dendrogram showing the *T. vivax* variant antigen profiles (VAPs) in the context of the current genomic database (N=29). Strains are colour-coded according to key. (B) Two most abundant VSG genes in the three transcriptomes previously published for *T. vivax* (strains LIEM-176 [33], IL1392 [34], and Lins [35]. Numbers 1) to 3) relate to the VSG type in C. (C) Geographical distribution of the 6

356 VSG transcripts described in B. This is information can be obtained from the analysis  
357 of the VAP heatmap presented in (A).

358

## 359 **Declarations**

360 Ethics approval and consent to participate

361 Not applicable.

362

363 Consent for publication

364 Not applicable.

365

366 Competing interests

367 The authors declare that they have no competing interests.

368

369 Funding

370 This work was supported by a Grand Challenges (Round 11) award from the Bill and

371 Melinda Gates Foundation, a BBSRC New investigator Award (BB/M022811/1), and

372 the Technology Directorate of the University of Liverpool to APJ.

373

374 Authors' contributions

375 SSP wrote the original code in Perl and tested the software. JH and ARJ wrote the

376 final code in Python. SSP and APJ conceptualized the software and wrote the

377 manuscript. All authors contributed to and approved the final manuscript.

378

## 379 **References**

380 1. Barry JD, Ginger ML, Burton P, McCulloch R. Why are parasite contingency genes

381 often associated with telomeres? *Int. J. Parasitol.* 2003;33:29–45.

382 2. de la Fuente J, Lew A, Lutz H, Meli ML, Hofmann-Lehmann R, Shkap V, et al.

383 Genetic diversity of anaplasma species major surface proteins and implications for

384 anaplasmosis serodiagnosis and vaccine development. *Anim. Health Res. Rev.*  
385 2005;6:75–89.

386 3. Kyes SA, Kraemer SM, Smith JD. Antigenic variation in *Plasmodium falciparum*:  
387 Gene organization and regulation of the var multigene family. *Eukaryot. Cell.*  
388 2007;6:1511–20.

389 4. McCulloch R, Cobbold CA, Figueiredo L, Jackson A, Morrison LJ, Mugnier MR, et  
390 al. Emerging challenges in understanding trypanosome antigenic variation. *Emerg.*  
391 *Top. Life Sci.* 2017;1:585–92.

392 5. Pays E. The variant surface glycoprotein as a tool for adaptation in African  
393 trypanosomes. *Microbes Infect.* 2006;8:930–7.

394 6. Cross G a M, Kim HS, Wickstead B. Capturing the variant surface glycoprotein  
395 repertoire (the VSGnome) of *Trypanosoma brucei* Lister 427. *Mol. Biochem.*  
396 *Parasitol.* Elsevier B.V.; 2014;195:59–73.

397 7. Matthews KR, McCulloch R, Morrison LJ. The within-host dynamics of African  
398 trypanosome infections. *Philos. Trans. R. Soc. Lond. B. Biol. Sci.*  
399 2015;370:20140288-.

400 8. Capewell P, Clucas C, DeJesus E, Kieft R, Hajduk S, Veitch N, et al. The TgsGP  
401 gene is essential for resistance to human serum in *Trypanosoma brucei* gambiense.  
402 *PLoS Pathog.* 2013;9:e1003686.

403 9. Uzureau P, Uzureau S, Lecordier L, Fontaine F, Tebabi P, Homblé F, et al.  
404 Mechanism of *Trypanosoma brucei* gambiense resistance to human serum. *Nature.*  
405 2013;501:430–4.

406 10. De Greef C, Hamers R. The serum resistance-associated (SRA) gene of  
407 *Trypanosoma brucei* rhodesiense encodes a variant surface glycoprotein-like protein.  
408 *Mol. Biochem. Parasitol.* 1994;68:277–84.

409 11. Van Xong H, Vanhamme L, Chamekh M, Chimfwembe CE, Van Den Abbeele J,  
410 Pays A, et al. A VSG expression site-associated gene confers resistance to human  
411 serum in *Trypanosoma rhodesiense*. *Cell.* 1998;95:839–46.

412 12. Wiedemar N, Graf FE, Zwyer M, Ndomba E, Kunz Renggli C, Cal M, et al.  
413 Beyond immune escape: a variant surface glycoprotein causes suramin resistance in  
414 *Trypanosoma brucei*. *Mol. Microbiol.* 2018;107:57–67.

415 13. Salmon D, Geuskens M, Hanocq F, Hanocq-Quertier J, Nolan D, Ruben L, et al.  
416 A novel heterodimeric transferrin receptor encoded by a pair of VSG expression site-  
417 associated genes in *T. brucei*. *Cell.* 1994;78:75–86.

418 14. Jackson AP, Berry A, Aslett M, Allison HC, Burton P, Vavrova-Anderson J, et al.  
419 Antigenic diversity is generated by distinct evolutionary mechanisms in African  
420 trypanosome species. *Proc. Natl. Acad. Sci. U. S. A.* 2012;109:3416–21.

421 15. Marcello L, Menon S, Ward P, Wilkes JM, Jones NG, Carrington M, et al. VSGdb:  
422 A database for trypanosome variant surface glycoproteins, a large and diverse family  
423 of coiled coil proteins. *BMC Bioinformatics.* 2007;8:1–8.

424 16. Weirather JL, Wilson ME, Donelson JE. Mapping of VSG similarities in  
425 *Trypanosoma brucei*. *Mol. Biochem. Parasitol.* 2012;181:141–52.

426 17. Mugnier MR, Cross GAM, Papavasiliou FN. The in vivo dynamics of antigenic  
427 variation in *Trypanosoma brucei*. *Science (80-. ).* 2015;347:1470–3.

428 18. Silva Pereira S, Casas-Sanchez A, Haines LR, Absolomon K, Ogugo M, Sanders  
429 M, et al. Variant antigen repertoires in *Trypanosoma congolense* populations and  
430 experimental infections can be profiled from deep sequence data with a set of  
431 universal protein motifs. *Genome Res.* 2018;28:1383–94.

432 19. Blankenberg D, Von Kuster G, Bouvier E, Baker D, Afgan E, Stoler N, et al.  
433 Dissemination of scientific software with Galaxy ToolShed. *Genome Biol.* 2014.

434 20. Afgan E, Baker D, van den Beek M, Blankenberg D, Bouvier D, Čech M, et al.  
435 The Galaxy platform for accessible, reproducible and collaborative biomedical  
436 analyses: 2016 update. *Nucleic Acids Res.* 2016;44:W3–10.

437 21. Cock PJA, Fields CJ, Goto N, Heuer ML, Rice PM. The Sanger FASTQ file  
438 format for sequences with quality scores, and the Solexa/Illumina FASTQ variants.  
439 *Nucleic Acids Res.* 2009;38:1767–71.



- 440 22. Pearson WR, Lipman DJ. Improved tools for biological sequence comparison.  
441 Proc. Natl. Acad. Sci. 1988;85:2444–8.
- 442 23. Zerbino DR. Using the Velvet de novo assembler for short-read sequencing  
443 technologies. Curr. Protoc. Bioinforma. 2010.
- 444 24. Eddy SR. A new generation of homology search tools based on probabilistic  
445 inference. Genome Inform. 2009;23:205–11.
- 446 25. Tihon E, Imamura H, Dujardin J-C, Van Den Abbeele J, Van den Broeck F.  
447 Discovery and genomic analyses of hybridization between divergent lineages of  
448 *Trypanosoma congolense* , causative agent of Animal African Trypanosomiasis. Mol.  
449 Ecol. 2017;
- 450 26. Langmead B, Salzberg SL. Fast gapped-read alignment with Bowtie 2. Nat  
451 Methods. 2012;9:357–9.
- 452 27. Trapnell C, Roberts A, Goff L, Pertea G, Kim D, Kelley DR, et al. Differential gene  
453 and transcript expression analysis of RNA-seq experiments with TopHat and  
454 Cufflinks. Nat. Protoc. 2012;7:562–78.
- 455 28. Gibson W. The origins of the trypanosome genome strains *Trypanosoma brucei*  
456 *brucei* TREU 927, *T. b. gambiense* DAL 972, *T. vivax* Y486 and *T. congolense*  
457 IL3000. Parasit. Vectors. BioMed Central Ltd; 2012;5:71.
- 458 29. Young CJ, Godfrey DG. Enzyme polymorphism and the distribution of  
459 *Trypanosoma congolense* isolates. Ann. Trop. Med. Parasitol. 1983;77:467–81.
- 460 30. Abbas AH, Pereira SS, D'Archivio S, Wickstead B, Morrison LJ, Hall N, et al. The  
461 structure of a conserved telomeric region associated with variant antigen loci in the  
462 blood parasite *Trypanosoma congolense*. Genome Biol. Evol. 2018;evy186.
- 463 31. Awuoche EO, Weiss BL, Mireji PO, Vigneron A, Nyambega B, Murilla G, et al.  
464 Expression profiling of *Trypanosoma congolense* genes during development in the  
465 tsetse fly vector *Glossina morsitans morsitans*. Parasit. Vectors. Parasites & Vectors;  
466 2018;11:1–18.
- 467 32. Ferrante A, Allison AC. Alternative pathway activation of complement by African

trypanosomes lacking a glycoprotein coat. *Parasite Immunol.* 1983;5:491–8.

33. Greif G, Ponce de Leon M, Lamolle G, Rodriguez M, Piñeyro D, Tavares-Marques LM, et al. Transcriptome analysis of the bloodstream stage from the parasite *Trypanosoma vivax*. *BMC Genomics.* 2013;14:149.

34. Jackson AP, Goyard S, Xia D, Foth BJ, Sanders M, Wastling JM, et al. Global Gene Expression Profiling through the Complete Life Cycle of *Trypanosoma vivax*. *PLoS Negl. Trop. Dis.* 2015;9:e0003975.

35. Guedes RLM, Rodrigues CMF, Coatnoan N, Cosson A, Cadioli FA, Garcia HA, et al. A comparative in silico linear B-cell epitope prediction and characterization for South American and African *Trypanosoma vivax* strains. *Genomics. Elsevier;* 2018;0–1.

36. Morrison LJ, Vezza L, Rowan T, Hope JC. Animal African Trypanosomiasis: Time to Increase Focus on Clinically Relevant Parasite and Host Species. *Trends Parasitol.* 2016;32:599–607.

37. Welde BT, Chumo DA, Adoyo M, Kovatch RM, Mwongela GN, Opiyo EA. Haemorrhagic syndrome in cattle associated with *trypanosoma vivax* infection. *Trop. Anim. Health Prod.* 1983;15:95–102.

38. Paiva F, Lemos R a a De, Nakazato L, Mori a E, Brum KB, Bernardo KC, et al. *Trypanosoma Vivax* Em Bovinos No Pantanal Do Estado Do Mato Grosso Do Sul , Brasil: I – Acompanhamento Clínico . *Rev. Bras. Parasitol. Veterinária.* 2000;9:135–41.

39. Cadioli FA, de Athayde Barnabé P, Zacarias Machado R, Alves Teixeira MC, André MR, Sampaio PH, et al. First report of *Trypanosoma vivax* outbreak in dairy cattle in São Paulo state, Brazil. *Rev. Bras. Parasitol. Vet., Jaboticabal.* 2012;21:118–24.

40. Fidelis Jr OL, Sampaio PH, Machado RZ, Andre MR, Marques LC, Cadioli FA. Evaluation of clinical signs , parasitemia , hematologic and biochemical changes in cattle experimentally infected with *Trypanosoma vivax*. *Brazilian J. Vet. Parasitol.*

496 2016;2961:69–81.

497 41. Altschul SF, Gish W, Miller W, Myers EW, Lipman DJ. Basic local alignment

498 search tool. J. Mol. Biol. 1990;215:403–10.

499

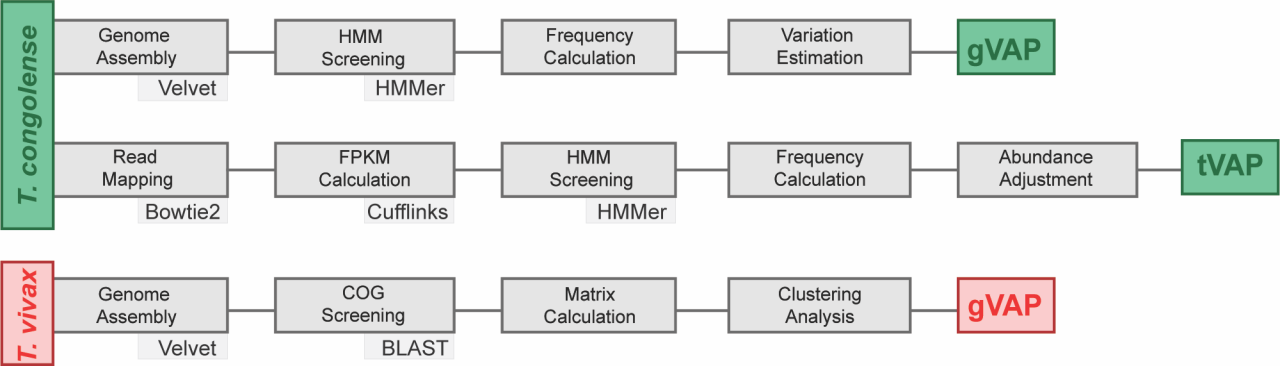

Galaxy

Analyze DataWorkflowShared DataVisualizationHelpUser

Using 0 bytes

Tools

search tools

Get Data

Import Data

Spectra Processing

Data Preparation

Plots

Select VAPPER here:

Statistics

Trypanosoma vapper (official tool)

VAPPER is a Variant Antigen Profiler that accurately quantifies the variant antigen diversity or presence in a Trypanosoma congolense or T.vivax isolate

Workflows

All workflows

VAPPER is a Variant Antigen Profiler that accurately quantifies the variant antigen diversity or presence in a Trypanosoma congolense or T.vivax isolate (Galaxy Version 1.0.0)

Options

Prefix Name

Test

Select Species

Trypanosoma congolense

Genomic or Transcriptomic Analysis?

Genomic

Contig file available?

Full assembly

Specify kmers

65

Insert length

400

Coverage cut off

5

Forward NGS Read File

No fastq dataset available.

Reverse NGS Read File

No fastq dataset available.

Export PDF of figures

YesNo

Execute

History

search datasets

Unnamed history

2: Test.html

2.2 KB

format: html, database: ?

transeq Test.fa Test\_6frame.fas – frame=6

[111, 9, 94, 78, 2, 5, 4, 54, 56, 73, 2, 14, 6, 3, 2, 25, 3, 110, 67, 58, 5, 10, 40, 7, 37, 92, 69, 61]

Translate nucleic acid sequences /home/galaxy/shed\_tools/toolshed.g

HTML file

Results will appear here

Select Species

Trypanosoma congolense

Trypanosoma congolense

Trypanosoma vivax

Genomic or Transcriptomic Analysis?

Genomic

Genomic

Transcriptomic

Contig file available?

Full assembly

Full assembly

Contig available

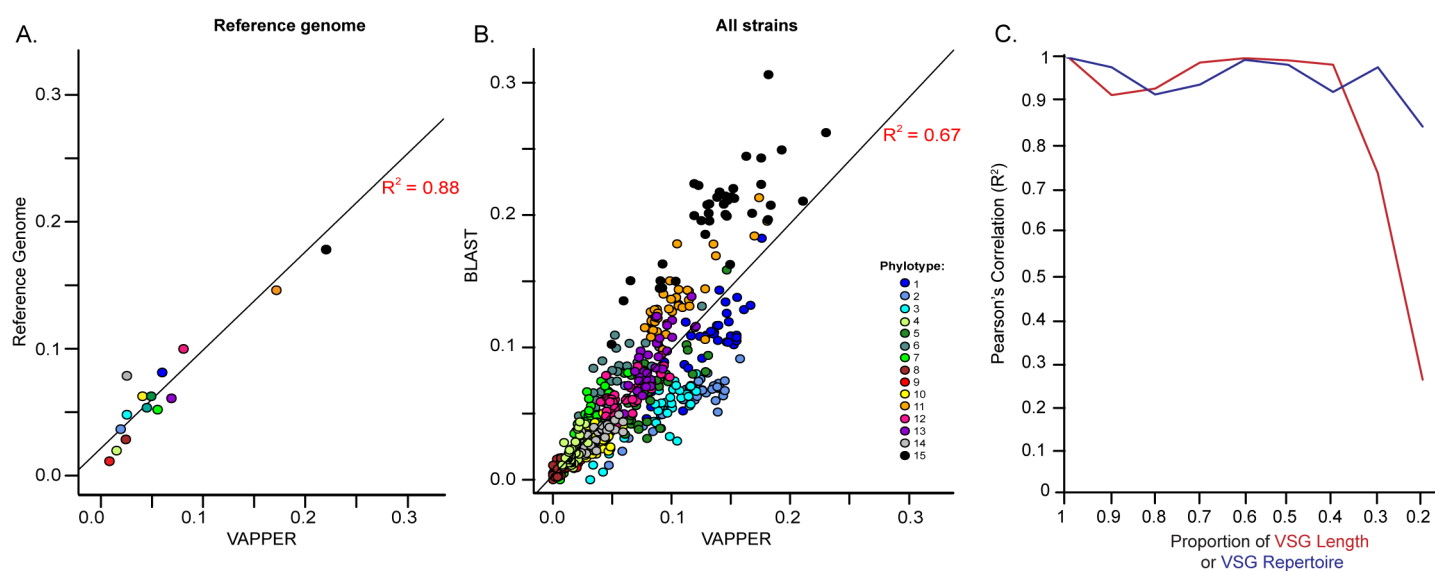

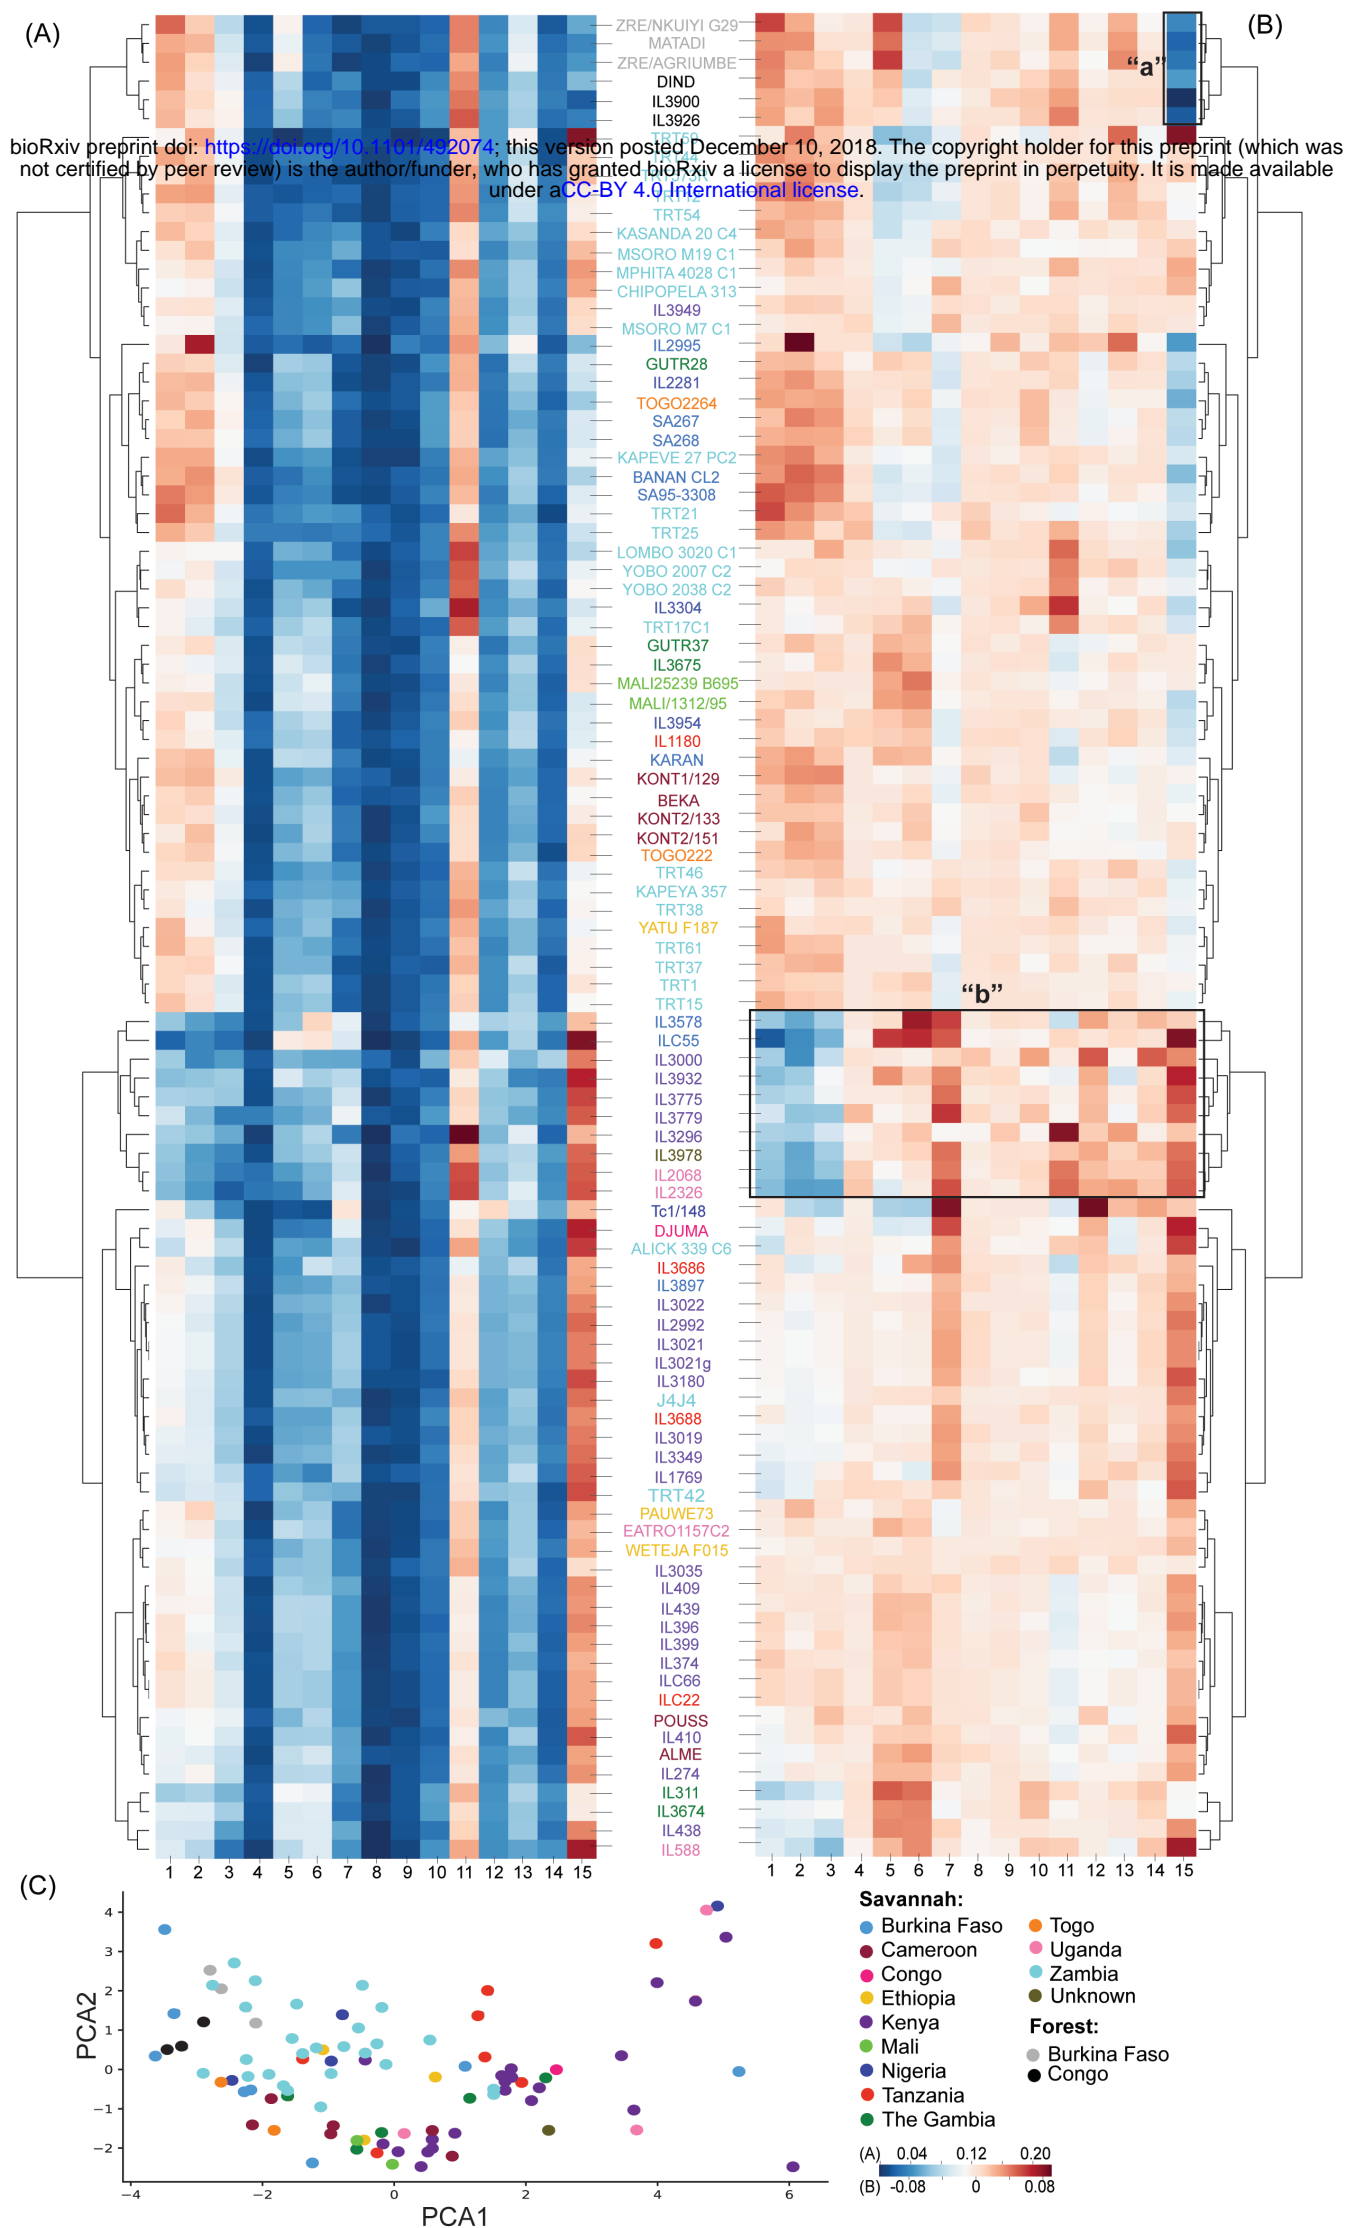

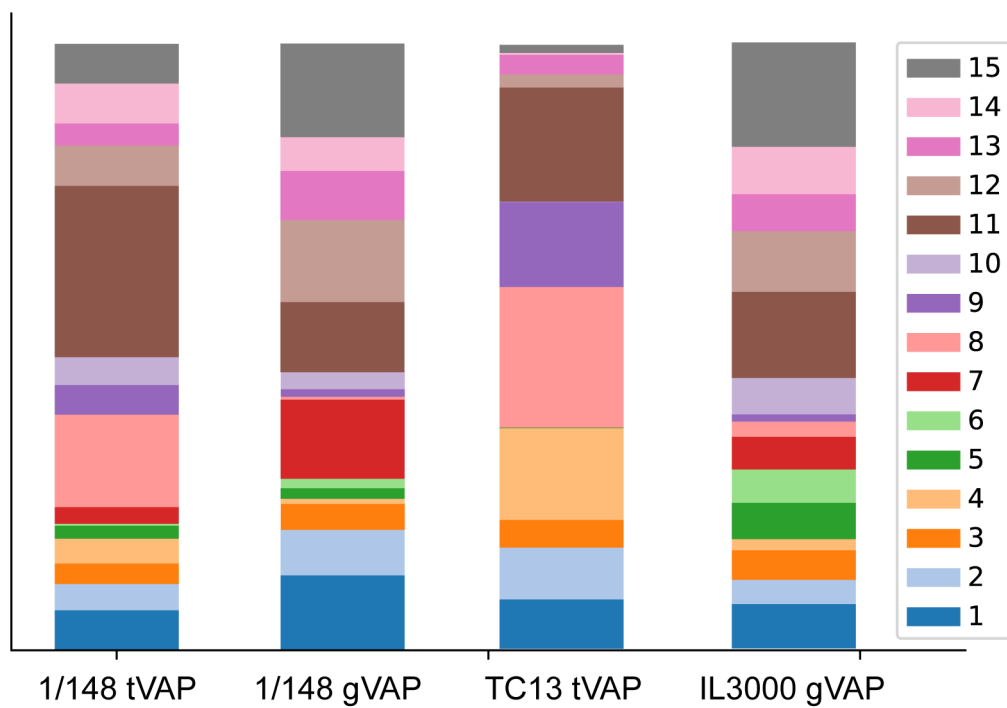



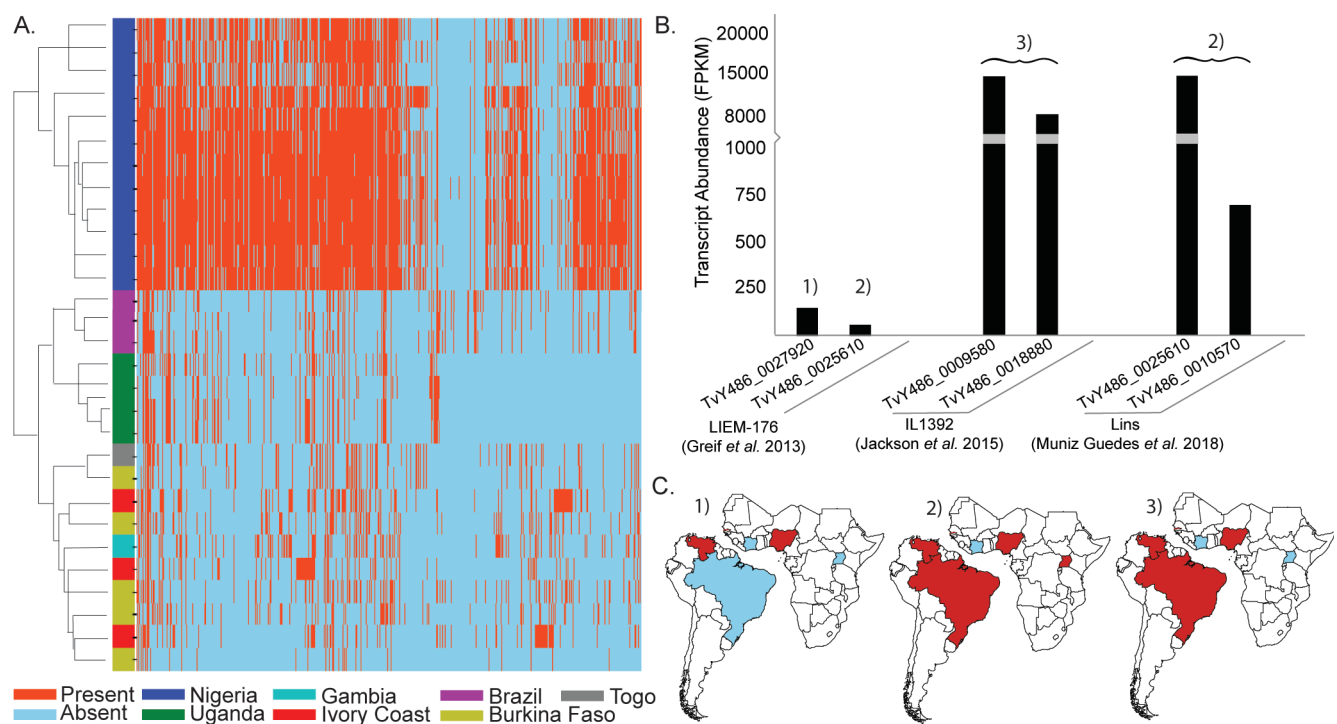

Source: http://biorxiv.org/content/10.1101/492074v1.full.pdf
